# Supplementary material
Source: Springer Nature journal article supplement (https://www.springermedizin.de/resource/supplementary/12879_2012_2206_MOESM3_ESM.pdf/9443620)

**A**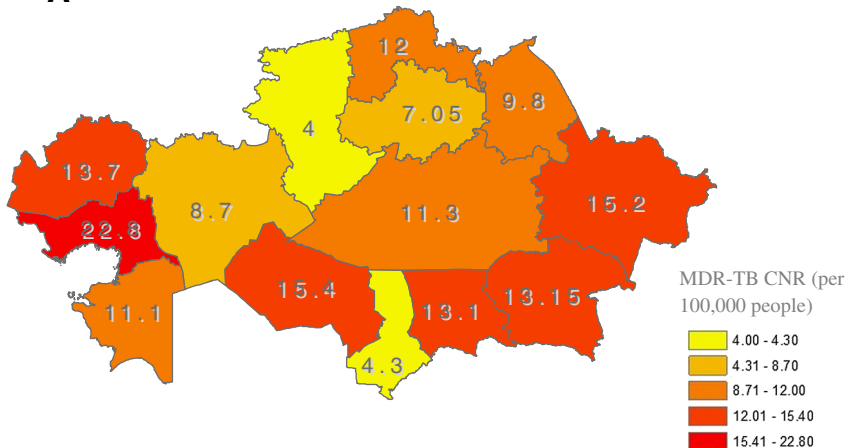**B**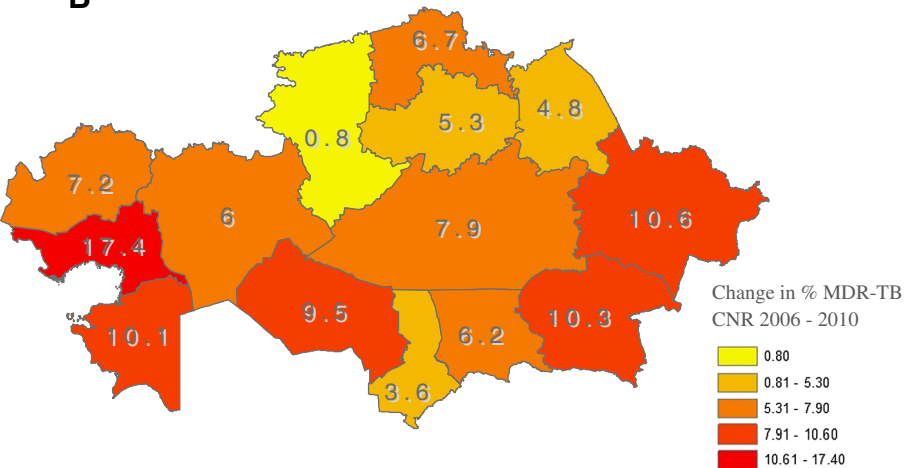

Supplement: MOESM3 [file 9443620]
